# Supplementary material for: Thermoelectric performance of organic conductors
Source: Royal Society of Chemistry journal article supplement (doi:10.1039/d4qm00466c), 2024-01-01
Supplement: d4qm00466c1.pdf [file d4qm00466c1.pdf]

## Supporting Information

# Thermoelectric performance of organic conductors

*Takehiko Mori*

Department of Materials Science and Engineering, Tokyo Institute of Technology, O-  
okayama 2-12-1, Meguro-ku, Tokyo 152-8552, Japan. E-mail: [mori.t@mac.titech.ac.jp](mailto:mori.t@mac.titech.ac.jp)

### Calculation of thermoelectric power

Eqn (2) is numerically integrated.<sup>47,48</sup>

$$K_0 = \tau \iiint v^2 \left( -\frac{df_0}{dE} \right) dk^3 = \frac{\tau}{\hbar^2} \frac{N_x \sum \Delta E^2 \left( -\frac{df_0}{dE} \right) a\pi}{N_y N_z bc} \quad (\text{S1})$$

The second form for  $v_x$  is derived from the following relation.

$$v_x = \frac{1}{\hbar} \frac{\partial E(k)}{\partial k_x} = \frac{N_x a \Delta E}{\hbar \pi} \quad (\text{S2})$$

The Brillouin zone is divided by a mesh of  $N_x \times N_y \times N_z$ , and  $E(k)$  is calculated at the respective points.  $E(k)$  is estimated from the tight-binding energy band considering only the highest occupied molecular orbital (HOMO) or lowest unoccupied molecular orbital (LUMO).<sup>S1,S2</sup> The interval of  $k$  contains  $\Delta k_x = \pi/aN_x$ , where  $\Delta k_x$  appears not only in the denominator coming from eqn (S2) but also in the numerator from the integration in eqn (S1). Accordingly,  $N_y N_z$  appears as the number of the summation, and  $N_x$  comes from the segment of the  $v_x$  calculation. In the actual calculation, the coefficient of eqn (S1) is  $\pi e^3/\hbar^2 = 1.2867 \times 10^{14} \text{ C}^2 \text{ \AA} \text{ J}^{-1} \text{ s}^{-2} \text{ cm}^{-2}$ , where  $(-df_0/dE)$  is proportional to inverse temperature and represented in  $\text{eV}^{-1}$  unit. Eqn (3) is estimated similarly.

For  $\beta$ -(BEDT-TTF)<sub>2</sub>I<sub>3</sub>,  $\kappa$ -(BEDT-TTF)<sub>2</sub>Cu(NCS)<sub>2</sub>, and  $\alpha$ -(BEDT-TTF)<sub>2</sub>NH<sub>4</sub>Hg(SCN)<sub>4</sub>, transfer integrals that are optimized so as to reproduce the observed thermoelectric power are used.<sup>47,48</sup> The reported transfer integrals are used for other cases.

When the Fermi energy crosses more than two energy bands,  $K_0$  and  $K_1$  are summed for these bands.

$$S = \frac{1}{eT} \frac{\sum_i K_{1i}}{\sum_i K_{0i}} = \frac{1}{eT} \frac{\sum_i (K_{1i}/K_{0i}) K_{0i}}{\sum_i K_{0i}} = \frac{\sum_i S_i \sigma_i}{\sum_i \sigma_i} \quad (\text{S3})$$

Here,  $K_{0i}$  represents  $K_0$  for different energy bands  $i$ . Using eqn (5), this is a weighted average of  $S_i$  with respect to  $\sigma_i$ .

**$K_0$  and  $K_1$  of TTF donors**

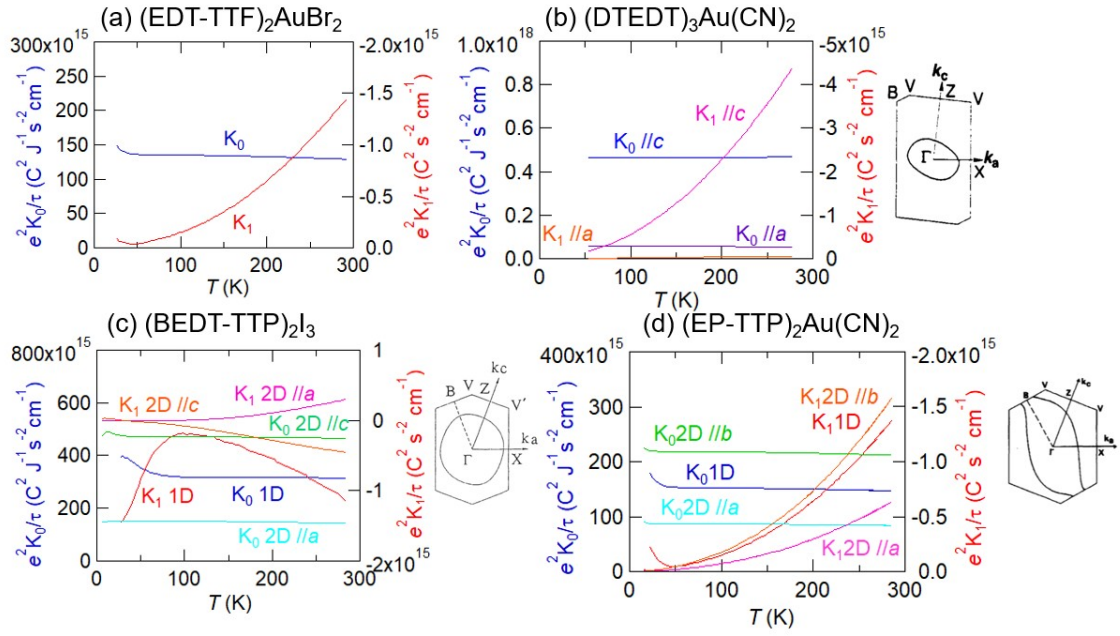

**Fig. S1** Calculated  $K_0$  and  $K_1$  integrals, and the Fermi surface of (a)  $(\text{EDT-TTF})_2\text{AuBr}_2$ , (b)  $(\text{DTEDT})_3\text{Au}(\text{CN})_2$ , (c)  $(\text{BEDT-TTP})_2\text{I}_3$ , and (d)  $(\text{EP-TTP})_2\text{Au}(\text{CN})_2$ .

**Table S1** Relaxation time ( $\tau$ ) and calculated  $K_0$  and  $K_1$  integrals.

| Compound                                                                | axis     | $\tau_{rt}$<br>$\times 10^{-15}$ (s) | $\tau_{max}$<br>$\times 10^{-15}$ (s) | axis       | $e^2K_0/\tau$ (rt)<br>$\times 10^{15}$ ( $C^2 J^{-1} s^{-2} cm^{-1}$ ) | $e^2K_1/\tau$ (rt)<br>$\times 10^{15}$ ( $C^2 s^{-2} cm^{-1}$ ) |
|-------------------------------------------------------------------------|----------|--------------------------------------|---------------------------------------|------------|------------------------------------------------------------------------|-----------------------------------------------------------------|
| (TTF)(TCNQ)                                                             | stack    | 7                                    | 70                                    | stack      | 58                                                                     | 0.49                                                            |
| (TMTSF) <sub>2</sub> PF <sub>6</sub>                                    | stack    | 1.6                                  | 600                                   | stack      | 310                                                                    | -2.7                                                            |
| $\beta$ -(BEDT-TTF) <sub>2</sub> I <sub>3</sub>                         | <i>a</i> | 0.3                                  | 100                                   | <i>a/b</i> | 120/210                                                                | -1.2/-1.5                                                       |
| $\kappa$ -(BEDT-TTF) <sub>2</sub> Cu(NCS) <sub>2</sub>                  | <i>c</i> | 0.7                                  | 130                                   | <i>c/b</i> | 14/8                                                                   | -0.73/0.62                                                      |
| $\alpha$ -(BEDT-TTF) <sub>2</sub> KHg(SCN) <sub>4</sub>                 | <i>c</i> | 0.1                                  | 1.8                                   | <i>c/a</i> | 55/560                                                                 | -0.2/2.1                                                        |
| $\alpha$ -(BEDT-TTF) <sub>2</sub> NH <sub>4</sub> Hg(SCN) <sub>4</sub>  | <i>c</i> | 1.2                                  | 700                                   | <i>c/a</i> | 19/210                                                                 | -0.17/1.8                                                       |
| $\alpha$ -(BEDT-TTF) <sub>2</sub> I <sub>3</sub>                        | <i>a</i> | 0.3                                  | 1.5                                   | <i>a/b</i> | 56/47                                                                  | -1.6/0.70                                                       |
| $\theta$ -(BEDT-TTF) <sub>2</sub> CsCo(SCN) <sub>4</sub>                | <i>c</i> | 3                                    | 7                                     | <i>c/a</i> | 12/82                                                                  | -0.12/-0.46                                                     |
| $\beta$ -(BEDT-TTF) <sub>2</sub> PF <sub>6</sub>                        | <i>c</i> | 0.6                                  | 0.72                                  | <i>c/a</i> | 14/71                                                                  | -0.21/0.47                                                      |
| $\beta''$ -(BEDT-TTF) <sub>4</sub> Pd(CN) <sub>4</sub> H <sub>2</sub> O | <i>a</i> | 0.4                                  |                                       | <i>a/c</i> | 210/400                                                                | -0.74/-2.2                                                      |
| (EDT-TTF) <sub>2</sub> AuBr <sub>2</sub>                                | stack    | 1.2                                  | 2.6                                   | stack      | 130                                                                    | -1.4                                                            |
| (DTEDT) <sub>3</sub> Au(CN) <sub>2</sub>                                | <i>c</i> | 3.2                                  | 48                                    | <i>c/a</i> | 470/54                                                                 | -4.4/0.054                                                      |
| (BEDT-TTP) <sub>2</sub> I <sub>3</sub>                                  | <i>c</i> | 2.2                                  | 75                                    | <i>c/a</i> | 470/140                                                                | -0.45/0.30                                                      |
| (EP-TTP) <sub>2</sub> Au(CN) <sub>2</sub>                               | stack    | 7.2                                  | 100                                   | <i>a/c</i> | 210/84                                                                 | -1.6/-0.63                                                      |
| (TTM-TTP)(I <sub>3</sub> ) <sub>3/5</sub>                               | stack    | 1.8                                  | 3.0                                   | stack      | 140                                                                    | 2.3                                                             |
| (BTBT) <sub>2</sub> AsF <sub>6</sub>                                    | stack    | 12                                   | 43                                    | stack      | 550                                                                    | -2.7                                                            |
| Cu(DMDCNQI) <sub>2</sub>                                                | stack    | 8                                    | 1600                                  | stack      | 130                                                                    | 1.3                                                             |

## TTM-TTP and $\tau$ -phase conductors

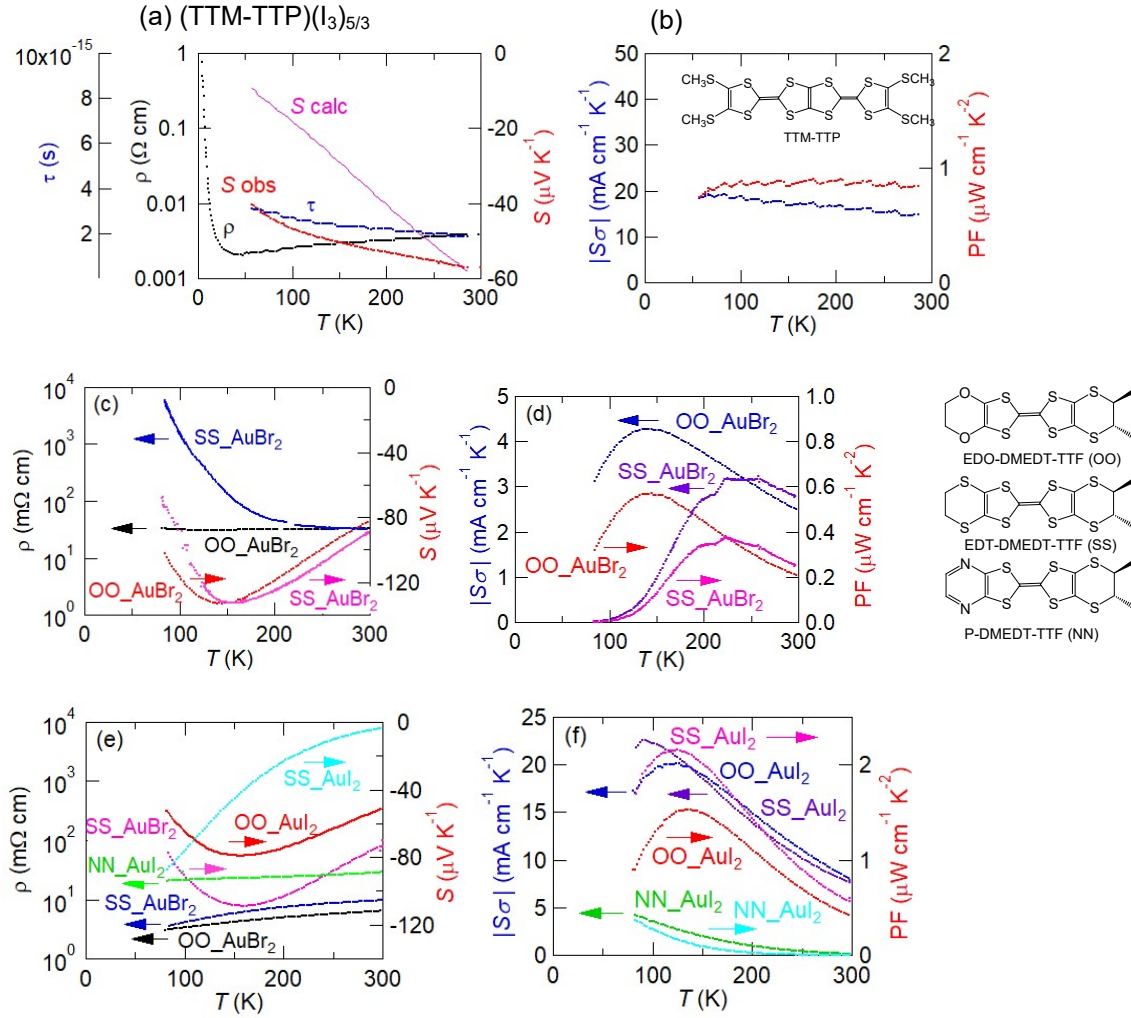

**Fig. S2** (a) Resistivity,  $\tau$ , and thermoelectric power, and (b)  $S\sigma$  and PF of (TTMTTP)(I<sub>3</sub>)<sub>5/3</sub>. (c) Resistivity,  $\tau$ , and thermoelectric power, and (d)  $S\sigma$  and PF of  $\tau$ -(EDO-DMEDT-TTF)<sub>2</sub>AuBr<sub>2</sub> and  $\tau$ -(EDT-DMEDT-TTF)<sub>2</sub>AuBr<sub>2</sub>. (e) Resistivity,  $\tau$ , and thermoelectric power, and (f)  $S\sigma$  and PF of  $\tau$ -(EDO-DMEDT-TTF)<sub>2</sub>AuI<sub>2</sub>,  $\tau$ -(EDT-DMEDT-TTF)<sub>2</sub>AuI<sub>2</sub>, and  $\tau$ -(P-DMEDT-TTF)<sub>2</sub>AuI<sub>2</sub>. EDO-DMEDT-TTF: ethylenedioxy-*S,S*-dimethylethylenedithio-TTF EDT-DMEDT-TTF: ethylenedithio-*S,S*-dimethylethylenedithio-TTF, and P-DMEDT-TTF: pyrazino-*S,S*-dimethylethylenedithio-TTF.

## BTBT and DMDCNQI

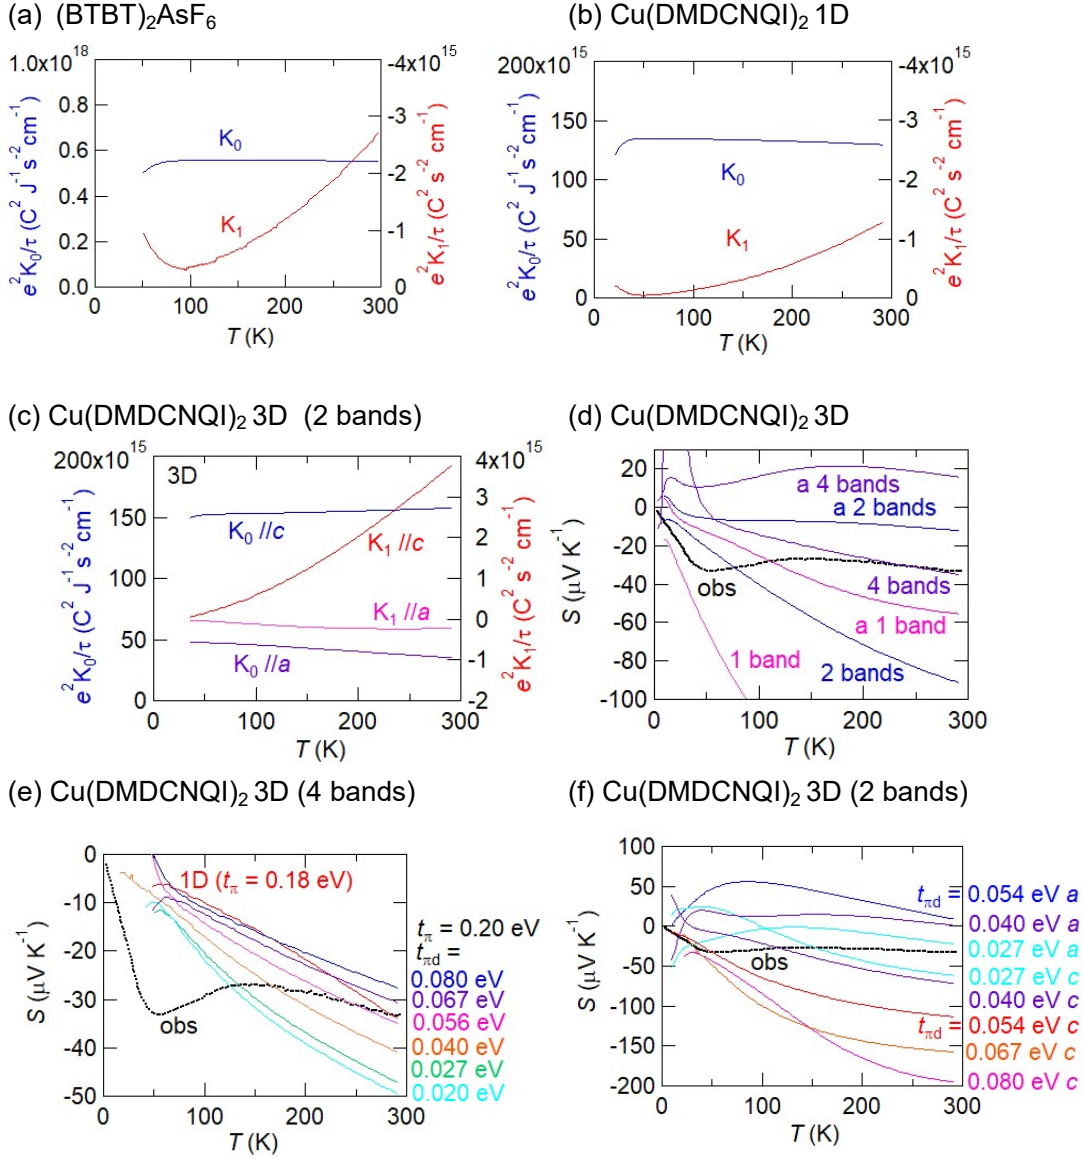

**Fig. S3** Calculated  $K_0$  and  $K_1$  integrals of (a)  $(\text{BTBT})_2\text{AsF}_6$ , (b)  $\text{Cu}(\text{DMDCNQI})_2$  based on the one-dimensional band, and (c) the three-dimensional two bands. (d) Calculated  $S$  along the  $c$  and  $a$  axes using the upper one, two, and four bands of  $\text{Cu}(\text{DMDCNQI})_2$  with  $t_c: 0.2$ ,  $t_{\pi d}: 0.054$ , and  $\Delta: 0.3$  eV.<sup>76</sup>  $t_{\pi d}$  dependence of  $S$  calculated for (e) upper four bands, and (f) two bands.

Due to the body centered symmetry, a unit of  $\text{Cu}(\text{DMDCNQI})_2$  contains four DMDCNQI molecules and two Cu atoms.<sup>75</sup> Considering the LUMO of DMDCNQI and a single 3d orbital of Cu, the energy bands consist of six bands (Fig. 7(e)). The resulting energy bands are identical to Ref. 77 using the same parameters,  $t_c: 0.2$ ,  $t_{\pi d}: 0.054$ , and  $\Delta: 0.3$  eV.

Owing to the 3D character, the upper two bands afford large  $S$ , while  $S$  of the next two is small (Table S2). When all four bands are included, the resulting  $S$  is small (Fig. 7(f)) because  $S$  of a multiband is a weighted average of  $S$  with respect to  $K_0$  following eqn (S3). Since the conductivity of a 1D band is larger than that of a 3D band ( $K_0$  in Table S2),  $S$  is small even when a 3D band with large  $S$  participates in the conduction. Even increasing  $t_{\pi d}$ , the overall  $S$  decreases (Fig. S3(e)) because  $S$  of the 1D band decreases (Table S2). By contrast,  $S$  of the 3D band increases with increasing  $t_{\pi d}$  (Fig. S3(f)). At the same time,  $S$  along the  $a$  axis shifts to the positive direction (Fig. S3(d) and (f)).

Even in the 3D band,  $S$  decreases with lowering the temperature. The observed increasing temperature dependence of  $S$  is not reproduced even including the Cu d orbital. The observed  $S$  is reproducible when the contribution of the 1D band is lost between 200 and 100 K potentially due to the 1D instability.

**Table S2**  $S$ ,  $K_0$ , and  $K_1$  of each band in Cu(DMDCNQI)<sub>2</sub>.

| $t_{\pi d}$ (eV) | $S_c$ (rt) ( $\mu\text{V K}^{-1}$ ) |      |      | $e^2 K_0/\tau$ (rt) $\times 10^{15}$ ( $\text{C}^2 \text{J}^{-1} \text{s}^{-2} \text{cm}^{-1}$ ) |      |      | $e^2 K_1/\tau$ (rt) $\times 10^{15}$ ( $\text{C}^2 \text{s}^{-2} \text{cm}^{-1}$ ) |      |      |
|------------------|-------------------------------------|------|------|--------------------------------------------------------------------------------------------------|------|------|------------------------------------------------------------------------------------|------|------|
|                  | 0.27                                | 0.54 | 0.80 | 0.27                                                                                             | 0.54 | 0.80 | 0.27                                                                               | 0.54 | 0.80 |
| 1                | -141                                | -156 | -185 | 21                                                                                               | 14   | 8.7  | 0.85                                                                               | 0.66 | 0.47 |
| 2                | -100                                | -71  | -56  | 33                                                                                               | 37   | 38   | 0.97                                                                               | 0.75 | 0.62 |
| 3                | -20                                 | -13  | -9   | 66                                                                                               | 73   | 78   | 0.39                                                                               | 0.28 | 0.21 |
| 4                | -20                                 | -13  | -9   | 66                                                                                               | 73   | 78   | 0.39                                                                               | 0.28 | 0.21 |
| sum              | -47                                 | -35  | -28  | 186                                                                                              | 198  | 202  | 2.6                                                                                | 1.97 | 1.51 |

## References

- S1 T. Mori, A. Kobayashi, Y. Sasaki, H. Kobayashi, G. Saito, H. Inokuchi, The intermolecular interaction of tetrathiafulvalene and bis(ethylenedithio)tetrathiafulvalene in organic metals. Calculation of orbital overlaps and models of energy-band structures, *Bull. Chem. Soc. Jpn.* 1984, **57**, 627.
- S2 The software is available from <http://indigo1026.la.coocan.jp/lib/program.html> (accessed 1 July 2024).
